# Supplementary material for: Enhanced photocatalytic performance of rhodamine B and enrofloxacin by Pt loaded Bi4V2O11: boosted separation of charge carriers, additional superoxide radical production, and the photocatalytic mechanism
Source: Royal Society of Chemistry journal article supplement (doi:10.1039/d1ra00055a), 2021-01-01
Supplement: d1ra00055a1.pdf [file d1ra00055a1.pdf]

## Supplementary Materials

### **Enhanced photocatalytic performance of Rhodamine B and Enrofloxacin by Pt loaded Bi<sub>4</sub>V<sub>2</sub>O<sub>11</sub>: Boosted separation of charge carriers, additional superoxide radical production, and the photocatalytic mechanism**

Yanjun Zhao<sup>a</sup>, Xintong Liu<sup>b</sup>, Shaonan Gu<sup>c</sup>, Jiemin Liu<sup>a,\*</sup>

<sup>a</sup> School of Chemistry and Biological Engineering, University of Science and Technology Beijing, Beijing 100083, China

<sup>b</sup> School of Light Industry, Beijing Technology and Business University, Beijing 100048, China

<sup>c</sup> Key Laboratory of Fine Chemicals in Universities of Shandong, School of Chemistry and Pharmaceutical Engineering, Qilu University of Technology (Shandong Academy of Sciences), Jinan, China

\*Corresponding Author. Tel.: (+86)-10-8237-6678; fax: (+86)-10-6233-2281.

*E-mail address:* liujm@ustb.edu.cn (Jiemin Liu).

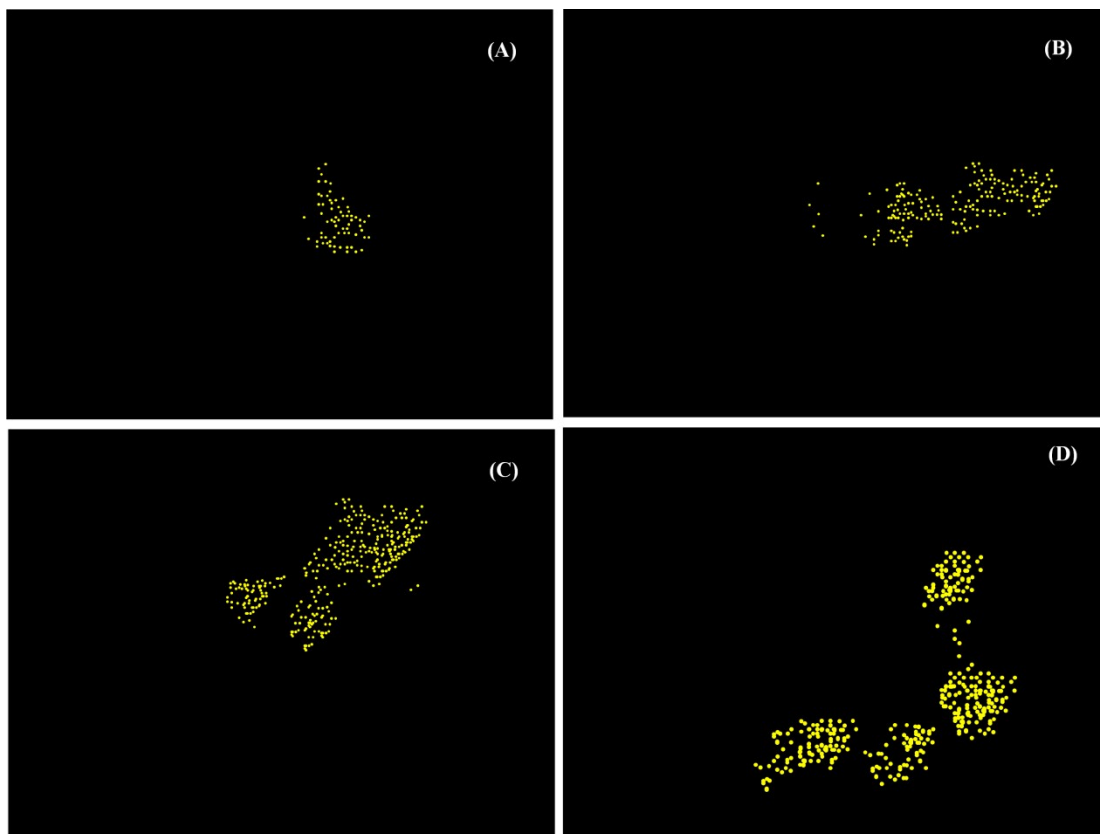

**Fig. S1** EDS mapping of (A) 2%Pt- $\text{Bi}_4\text{V}_2\text{O}_{11}$ , (B) 4%Pt- $\text{Bi}_4\text{V}_2\text{O}_{11}$ , (C) 6%Pt- $\text{Bi}_4\text{V}_2\text{O}_{11}$ , (D) 8%Pt- $\text{Bi}_4\text{V}_2\text{O}_{11}$ .

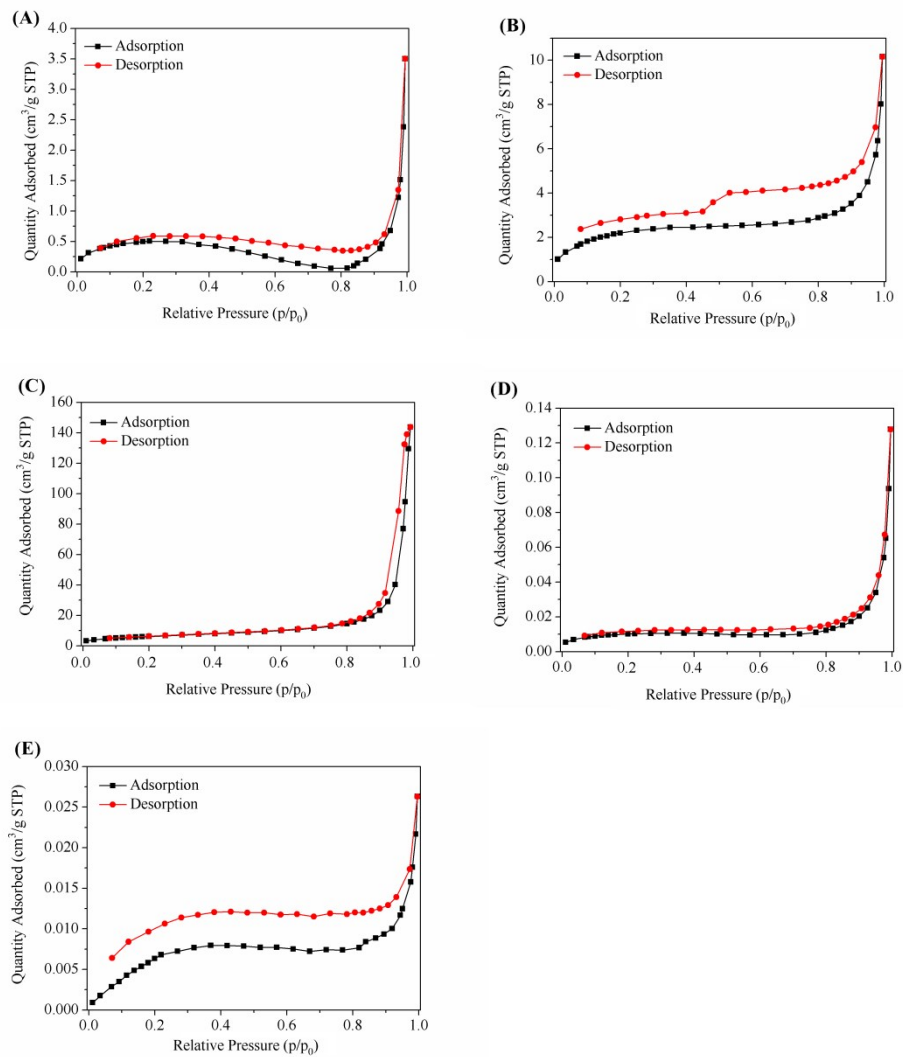

**Fig. S2** The  $N_2$  adsorption-desorption isotherm of (A)  $Bi_4V_2O_{11}$ , (B) 2%Pt- $Bi_4V_2O_{11}$ , (C) 4%Pt- $Bi_4V_2O_{11}$ , (D) 6%Pt- $Bi_4V_2O_{11}$ , (E) 8%Pt- $Bi_4V_2O_{11}$ .

**Table S1** The BET surface areas and N<sub>2</sub> sorption capacities of as-prepared photocatalysts.

| Sample                                              | BET surface area (m <sup>2</sup> g <sup>-1</sup> ) | N <sub>2</sub> sorption capacity (cm <sup>3</sup> g <sup>-1</sup> ) |
|-----------------------------------------------------|----------------------------------------------------|---------------------------------------------------------------------|
| Bi <sub>4</sub> V <sub>2</sub> O <sub>11</sub>      | 1.83                                               | 3.50                                                                |
| 2%Pt-Bi <sub>4</sub> V <sub>2</sub> O <sub>11</sub> | 8.30                                               | 10.16                                                               |
| 4%Pt-Bi <sub>4</sub> V <sub>2</sub> O <sub>11</sub> | 22.48                                              | 143.72                                                              |
| 6%Pt-Bi <sub>4</sub> V <sub>2</sub> O <sub>11</sub> | 0.83                                               | 0.13                                                                |
| 8%Pt-Bi <sub>4</sub> V <sub>2</sub> O <sub>11</sub> | 0.66                                               | 0.03                                                                |

**Table S2** Recently published Bi<sub>4</sub>V<sub>2</sub>O<sub>11</sub> based photocatalysts for environmental remediation.

| Photocatalysts                                                                  | Structure                                                                                                                 | Object pollutants         | Ref.      |
|---------------------------------------------------------------------------------|---------------------------------------------------------------------------------------------------------------------------|---------------------------|-----------|
| Bi <sub>4</sub> V <sub>2</sub> O <sub>11</sub>                                  | hierarchical hollow microspheres                                                                                          | Rhodamine B               | 1         |
| BiVO <sub>4</sub> /Bi <sub>4</sub> V <sub>2</sub> O <sub>11</sub>               | heterojunction nanofibers                                                                                                 | Rhodamine B               | 2         |
| Bi <sub>4</sub> V <sub>2</sub> O <sub>11</sub>                                  | $\alpha$ - $\beta$ phase junction nanofibers                                                                              | Cr(VI)                    | 3         |
| Bi <sup>5+</sup> -self-doped Bi <sub>4</sub> V <sub>2</sub> O <sub>11</sub>     | p-n homojunctions nanotubes                                                                                               | Cr(VI)                    | 4         |
| Dy doped Bi <sub>4</sub> V <sub>2</sub> O <sub>11</sub>                         | nanoparticles                                                                                                             | Tetracycline              | 5         |
| Bi <sub>2</sub> WO <sub>6</sub> /Bi <sub>4</sub> V <sub>2</sub> O <sub>11</sub> | Bi <sub>4</sub> V <sub>2</sub> O <sub>11</sub> nanocrystals were anchored onto Bi <sub>2</sub> WO <sub>6</sub> nanoflakes | Cr(VI)                    | 6         |
| Bi-Quantum-Dot-Decorated Bi <sub>4</sub> V <sub>2</sub> O <sub>11</sub>         | hollow nanocakes                                                                                                          | CO <sub>2</sub> reduction | 7         |
| AgI/Bi <sub>4</sub> V <sub>2</sub> O <sub>11</sub>                              | flower-like particles                                                                                                     | sulfamethazine            | 8         |
| Pt loaded Bi <sub>4</sub> V <sub>2</sub> O <sub>11</sub>                        | nanoparticles dispersed on the irregular polygon grain morphology                                                         | Rhodamine B; Enrofloxacin | This work |

References:

1. X. Chen, J. Liu, H. Wang, Y. Ding, Y. Sun and H. Yan, *J. Mater. Chem. A*, 2013, **1**, 877-883.
2. C. Lv, G. Chen, J. Sun, Y. Zhou, S. Fan and C. Zhang, *Appl. Catal., B*, 2015, **179**, 54-60.
3. C. Lv, G. Chen, J. Sun and Y. Zhou, *Inorg. Chem.*, 2016, **55**, 4782-4789.
4. C. Lv, G. Chen, X. Zhou, C. Zhang, Z. Wang, B. Zhao and D. Li, *ACS Appl. Mater. Interfaces*, 2017, **9**, 23748-23755.
5. F. K. Naqvi, M. Faraz, S. Beg and N. Khare, *ACS Omega*, 2018, **3**, 11300-11306.
6. C. N. Ri, K. Song Gol, J. Ju Yong, S. N. Pak, S. C. Ri and J. H. Ri, *New J. Chem.*, 2018, **42**, 647-653.
7. X. Zhao, Z. Duan and L. Chen, *Ind. Eng. Chem. Res.*, 2019, **58**, 10402-10409.
8. X. J. Wen, L. Qian, X. X. Lv, J. Sun, J. Guo, Z. H. Fei and C. G. Niu, *J. Hazard. Mater.*, 2020, **385**, 121508.
